# Supplementary material for: Variability of the infrared complex refractive index of African mineral dust: experimental estimation and implications for radiative transfer and satellite remote sensing
Source: Copernicus journal article supplement (doi:10.5194/acp-14-11093-2014), 2014-10-22
Supplement: Supplementary file 1 [file acp-14-11093-2014-supplement.zip]

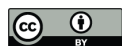

## *Supplement of*

# **Variability of the infrared complex refractive index of African mineral dust: experimental estimation and implications for radiative transfer and satellite remote sensing**

**C. Di Biagio et al.**

*Correspondence to:* C. Di Biagio ([claudia.dibiagio@lisa.u-pec.fr](mailto:claudia.dibiagio@lisa.u-pec.fr))

- [Supplement-Cover-Letter.pdf](#)
- [refractive\\_index\\_DiBiagio.txt](#)
